# Supplementary material for: High-fat diet induced obesity primes inflammation in adipose tissue prior to liver in C57BL/6j mice
Source: publisher site journal article supplement (doi:10.18632/aging.100738), 2015-04-23
Supplement: Supplementary file [file aging-v7i4-100738-supplementary-material-SD1.pdf]

## SUPPLEMENTARY MATERIAL

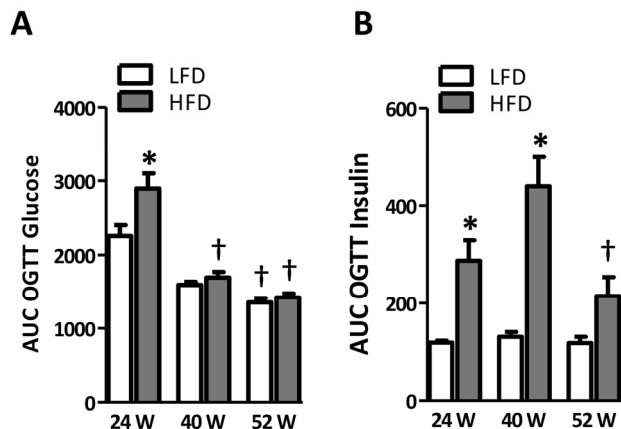

**Supplementary Figure 1. Glucose and insulin during OGTT.** (A) Glucose and (B) insulin homeostasis during oral glucose tolerance test (OGTT) quantified by area under curve (AUC) based on data in Fig. 2B-E. Significance level set at  $p < 0.05$ . \*=significant from LFD at same time point, †=significant from same diet 24w, ‡=significant from same diet 40w.

**Supplementary Table 1. Primer sequences applied for gene expression analyses in AT and liver.** Primer sequences for *Tnf*, *Mcp1*, *Il-1 $\beta$* , *F4/80*, *Ppia* and *Il-10*

| Gene                         | Forward primer 5'-3'     | Reverse primer 5'-3'     |
|------------------------------|--------------------------|--------------------------|
| <i>F4/80</i>                 | TGTGTCGTGCTGTTCAGAACC    | AGGAATCCCGCAATGATGG      |
| <i>Mcp1</i>                  | GCTGGAGAGCTACAAGAGGATCA  | ACAGACCTCTCTCTTGAGCTTGGT |
| <i>Il1<math>\beta</math></i> | TGCAGCTGGAGAGTGTGG       | TGCTTGTGAGGTGCTGATG      |
| <i>Il10</i>                  | GCTCTTACTGACTGGCATGAG    | CGCAGCTCTAGGAGCATGTG     |
| <i>Tnf</i>                   | GTAGCCCACGTCGTAGCAAAC    | AGTTGGTTGTCTTTGAGATCCATG |
| <i>Ppia</i>                  | TTCCTCCTTTCACAGAATTATCCA | CCGCCAGTGCCATTATGG       |
